# Supplementary material
Source: PubMed Central journal article supplement (PMC9827547)

## Figure 5C

Fig. 5C ( $\alpha$ -V5 Ab, WCL)

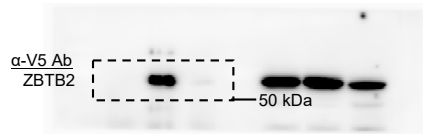

Fig. 5C ( $\alpha$ -myc Ab, WCL)

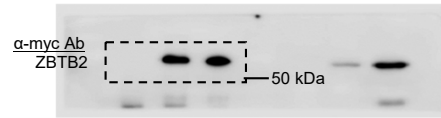

Fig. 5C ( $\alpha$ -V5 Ab, WCL)

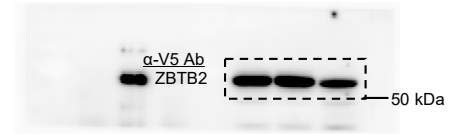

Fig. 5C ( $\alpha$ -myc Ab, WCL)

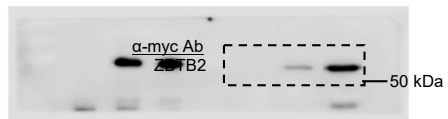

Fig. 5C ( $\alpha$ - $\beta$ -actin Ab, WCL)

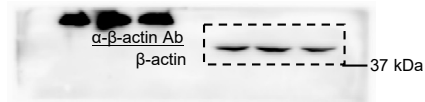

## Figure 5H

Fig. 5H ( $\alpha$ -myc Ab)

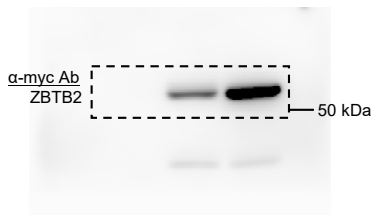

Fig. 5H ( $\alpha$ - $\beta$ -actin Ab)

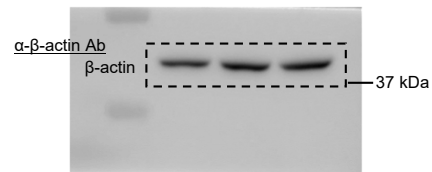

Supplement: EMBR-24-e54042-s004.pdf [file EMBR-24-e54042-s004.pdf]
