# Supplementary material
Source: PubMed Central journal article supplement (PMC9827547)

**Figure 2G**

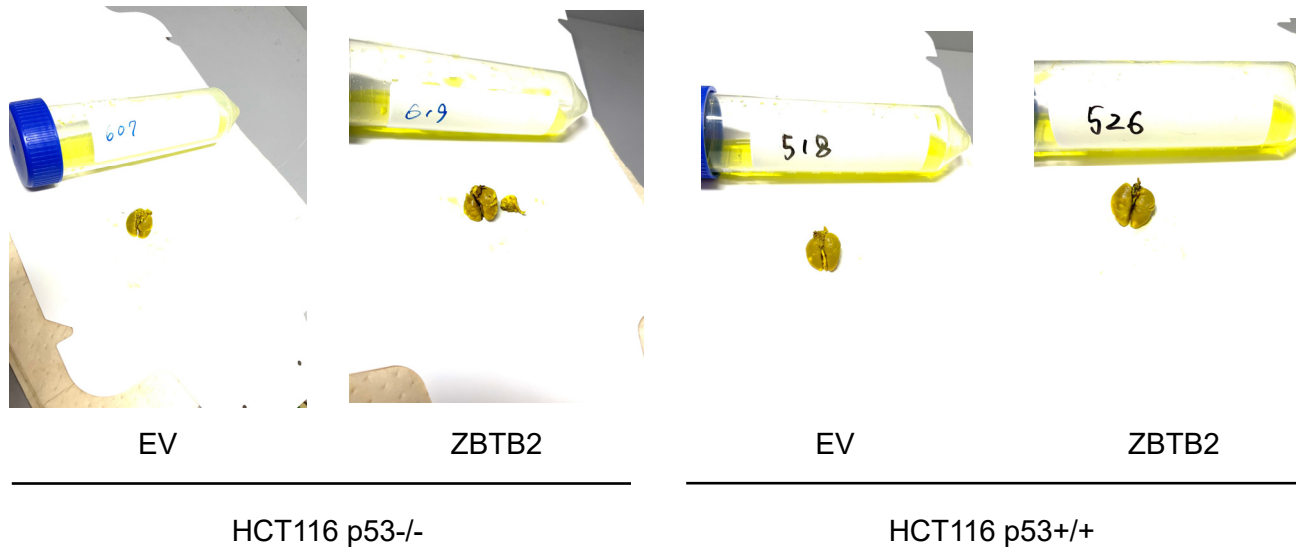

**Figure 2J**

Fig. 2J ( $\alpha$ -myc Ab)

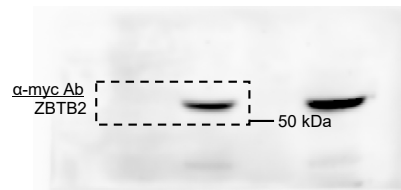

Fig. 2J ( $\alpha$ - $\beta$ -actin Ab)

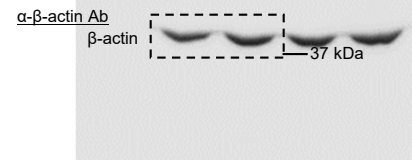

**Figure 2K**

Fig. 2K ( $\alpha$ -myc Ab)

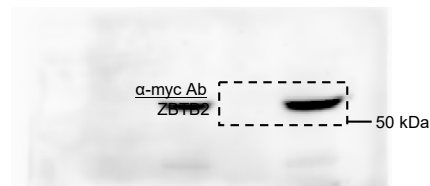

Fig. 2K ( $\alpha$ - $\beta$ -actin Ab)

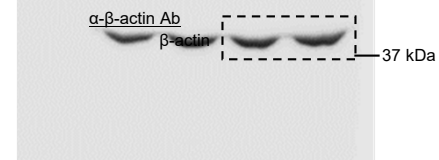

Supplement: EMBR-24-e54042-s006.pdf [file EMBR-24-e54042-s006.pdf]
