# Supplementary material
Source: PubMed Central journal article supplement (PMC9827547)

## Figure 4A

Fig. 4A ( $\alpha$ -HIF-1 $\alpha$  Ab)

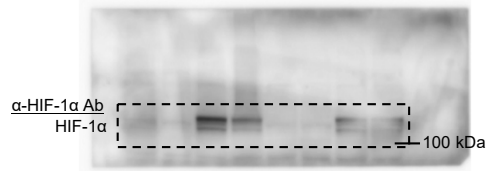

Fig. 4A ( $\alpha$ -p53 Ab)

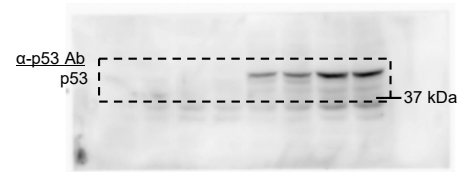

Fig. 4A ( $\alpha$ -myc Ab)

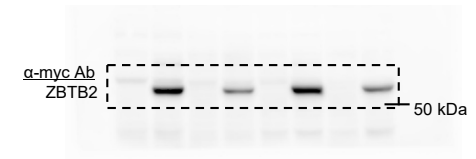

Fig. 4A ( $\alpha$ - $\beta$ -actin Ab)

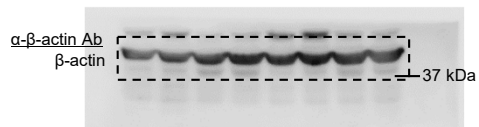

## Figure 4H

Fig. 4H ( $\alpha$ -V5 Ab, IP)

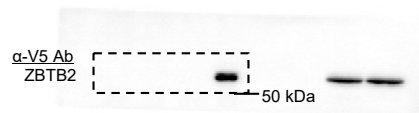

Fig. 4H ( $\alpha$ -myc Ab, IP)

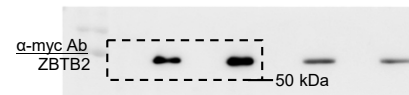

Fig. 4H ( $\alpha$ -V5 Ab, WCL)

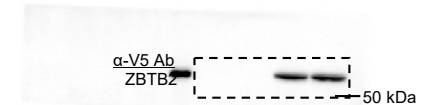

Fig. 4H ( $\alpha$ -myc Ab, WCL)

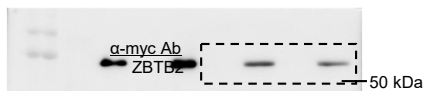

Fig. 4H ( $\alpha$ - $\beta$ -actin Ab, WCL)

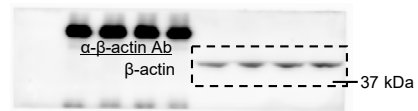

Supplement: EMBR-24-e54042-s012.pdf [file EMBR-24-e54042-s012.pdf]
