# Supplementary material
Source: PubMed Central journal article supplement (PMC9827547)

## Figure 1C

Fig. 1C ( $\alpha$ - $\beta$ -actin Ab)

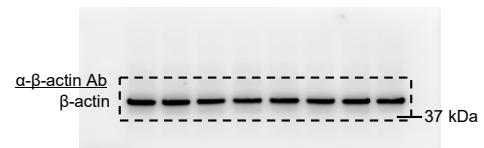

Fig. 1C ( $\alpha$ -p53 Ab)

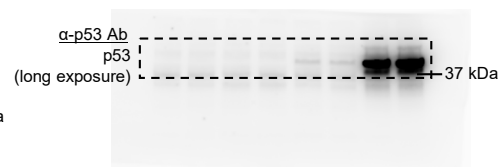

Fig. 1C ( $\alpha$ -p53 Ab)

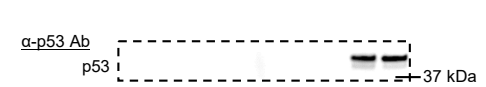

Supplement: EMBR-24-e54042-s002.pdf [file EMBR-24-e54042-s002.pdf]

Figure 3A

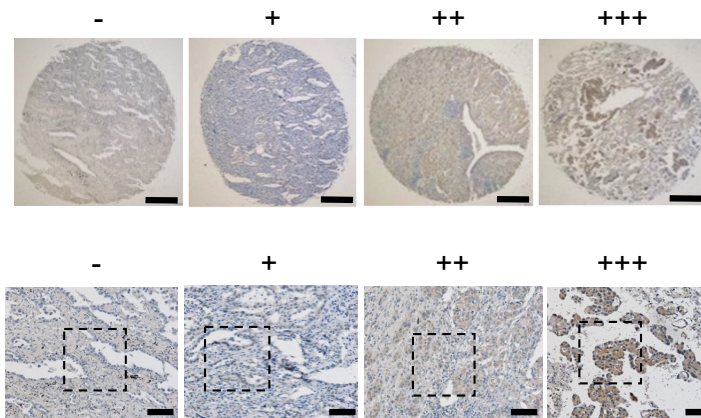

Supplement: EMBR-24-e54042-s008.pdf [file EMBR-24-e54042-s008.pdf]
